# Supplementary material
Source: publisher figshare collection journal article supplement (https://frontiersin.figshare.com/ndownloader/files/21998445)
Supplement: Supplementary file 1 [file 21998445]

Supplementary Material

# Supplementary Table

**Table S1.** Key specific challenges according to A) target end market, B) stages in the biodiscovery value chain, and C) organisation type.


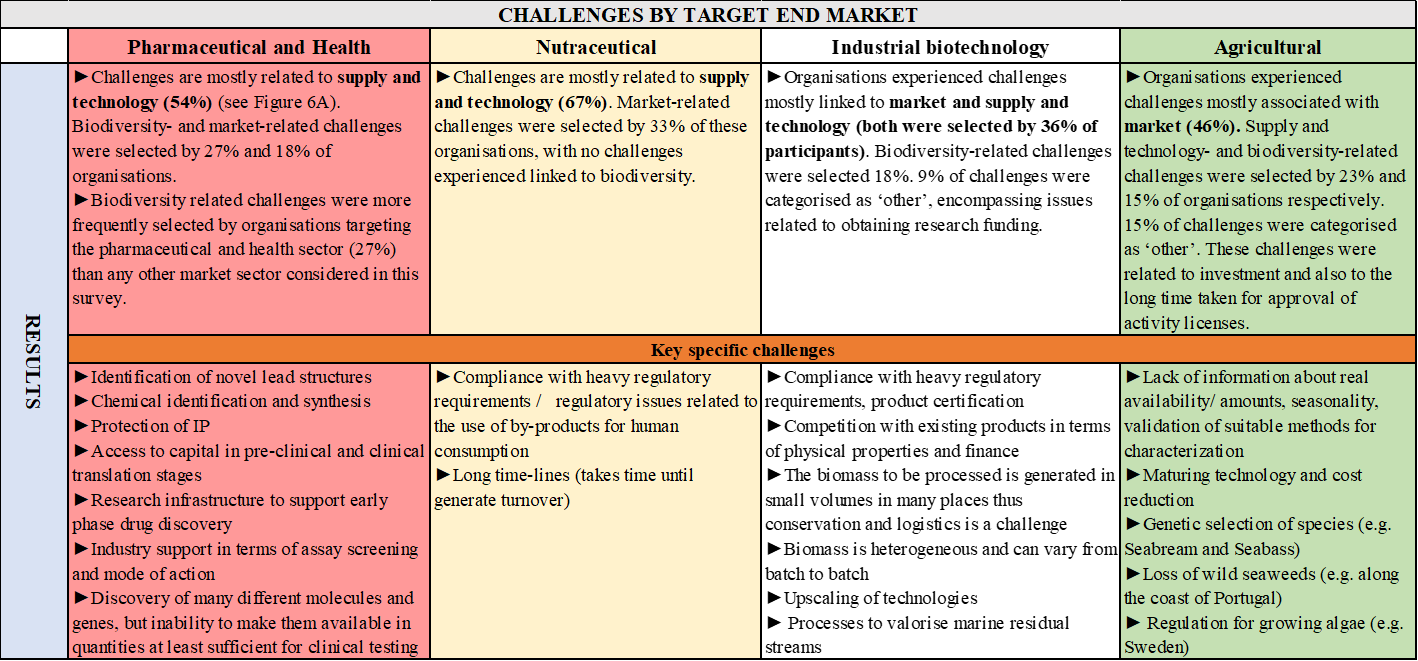


**A**

**B**

**C**
